# Supplementary material
Source: PubMed Central journal article supplement (PMC8519294)

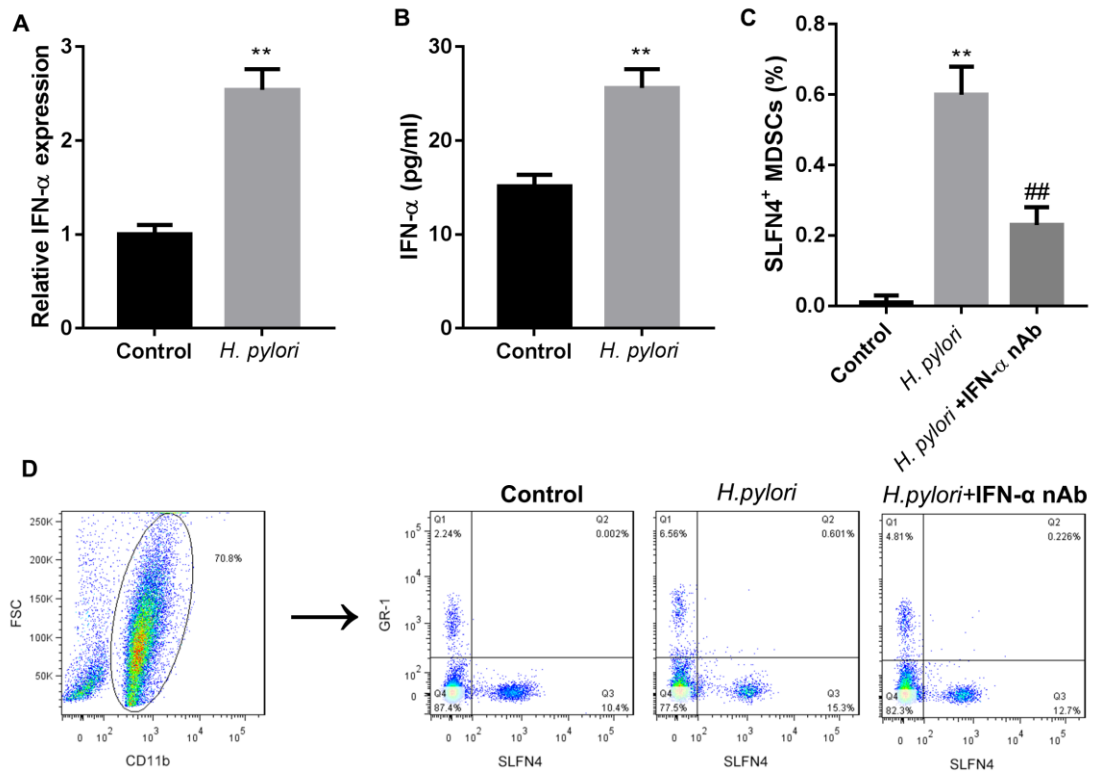

Supplementary figure 1

Supplement: iai.00407-21-s0001.pdf [file iai.00407-21-s0001.pdf]
